# Supplementary material
Source: HighWire-hosted journal article supplement (https://bmjopen.bmj.com/content/9/2/e024185)
Supplement: inline-supplementary-material-3 [file inline-supplementary-material-3.pdf]

Supplementary Material 3: Descriptions of the intervention development frameworks included in the review.

| Name of framework                 | Description                                                                                                                                                                                                                                                                                             | Key reference(s) or website                                                                                                                                                                                                                                                                                                                                                               |
|-----------------------------------|---------------------------------------------------------------------------------------------------------------------------------------------------------------------------------------------------------------------------------------------------------------------------------------------------------|-------------------------------------------------------------------------------------------------------------------------------------------------------------------------------------------------------------------------------------------------------------------------------------------------------------------------------------------------------------------------------------------|
| Medical Research Council Guidance | The Medical Research Council guidance is a published framework for evaluating complex interventions. Its original 2000 guidance was updated in 2008 and suggests a non-linear phased sequence.                                                                                                          | Craig P, Dieppe P, Macintyre S, Michie S, Nazareth I, Petticrew M. Developing and evaluating complex interventions: the new Medical Research Council guidance. <i>BMJ</i> 2008, 337:a1655.                                                                                                                                                                                                |
| Intervention Mapping              | Intervention Mapping is a six-stepped method going from identifying the problem through to solving the problem and is focused on behaviour change interventions. It is a self-described protocol which can aid the development of these types of interventions.                                         | Bartholomew LK, Parcel GS, Kok G, Gottlieb NH, Fernández ME. Planning Health Promotion Programs - An Intervention Mapping Approach. 3rd ed. San Francisco: CA: Jossey-Bass; 2011.<br><br><a href="https://interventionmapping.com/">https://interventionmapping.com/</a>                                                                                                                  |
| Conceptual Modelling              | Conceptual modelling is a term used in multiple fields (e.g., business, computing, social sciences and health research). A conceptual model is a model or diagrammatic representation of the rationale, process and/or outcomes. It has been used in health research previously and examples are given. | E.g.,<br>Wagner E, Austin B, Von Korff M: Organizing care for patients with chronic illness. <i>Milbank Q</i> 1996, 74:511–543.<br><br>Gask et al., Improving access to psychosocial interventions for common mental health problems in the United Kingdom: narrative review and development of a conceptual model for complex interventions. <i>BMC Health Serv Res.</i> 2012;12(1):249. |
| Programme Theory                  | Programme theory is a term that has been used by evaluators to describe the theory underpinning a programme, such as a social or health intervention.<br><br>Programme theory also refers to a specific concept used within realistic evaluation.                                                       | Weiss CH (1998) Evaluation: Methods for Studying Programs and Policies. Upper Saddle River, NJ: Prentice Hall.<br><br>Pawson R and Tilley N (1997) Realistic Evaluation. London: SAGE.                                                                                                                                                                                                    |
| Van Meijel Model                  | The Van Meijel model was first reported in 2004 and was established in response to the development of a nursing-based intervention. The model uses four stages from defining the problem through to validating the intervention.                                                                        | Van Meijel B., Gamel C., van Swieten-Duijfjes B. & Grypdonck M.H. (2004) The development of evidence-based nursing interventions: methodological considerations. <i>Journal of Advanced Nursing</i> 48, 84–92.                                                                                                                                                                            |
